# Supplementary material
Source: PubMed Central journal article supplement (PMC9758208)
Supplement: 41598_2022_26457_MOESM1_ESM.pdf [file 41598_2022_26457_MOESM1_ESM.pdf]

Supplemental information

**COVID-19 plasma exosomes promote proinflammatory immune responses in peripheral blood mononuclear cells**

Lechuang Chen<sup>1</sup>, Rui Chen<sup>2</sup>, Min Yao<sup>3</sup>, Zhimin Feng<sup>1</sup>, Guoxiang Yuan<sup>1</sup>, Fengchun Ye<sup>4</sup>, Kien Nguyen<sup>4</sup>, Jonathan Karn<sup>4</sup>, Grace A. McComsey<sup>5</sup>, Thomas M. McIntyre<sup>2</sup>, Ge Jin<sup>1</sup>

<sup>1</sup>Department of Medicine, Case Western Reserve University School of Medicine, the MetroHealth Medical Center, Cleveland, Ohio 44109, USA.

<sup>2</sup>Department of Cardiovascular and Metabolic Sciences, Cleveland Clinic Lerner Research Institute, Cleveland, Ohio 44195, USA.

<sup>3</sup>Department of Radiation Oncology, Penn State Cancer Institute, the Pennsylvania State University College of Medicine, Hershey, Pennsylvania 17033, USA.

<sup>4</sup>Department of Molecular Biology and Microbiology, Case Western Reserve University School of Medicine, Cleveland, Ohio 44106, USA.

<sup>5</sup>Department of Pediatrics and Medicine, Case Western Reserve University School of Medicine, University Hospitals Cleveland Medical Center, Cleveland, Ohio 44106, USA.

**Supplementary Table 1. Patient parameters**

|                                                                                 | <b>Basis</b> | <b>Percentage</b> |
|---------------------------------------------------------------------------------|--------------|-------------------|
| <b>Total</b>                                                                    | 50           | 100               |
| <b>Gender</b>                                                                   |              |                   |
| male                                                                            | 23           | 46.0              |
| female                                                                          | 27           | 54.0              |
| <b>Age</b>                                                                      |              |                   |
| under 30                                                                        | 4            | 8.0               |
| 31-49                                                                           | 12           | 24.0              |
| 50-79                                                                           | 28           | 56.0              |
| over 80                                                                         | 6            | 12.0              |
| <b>Social History</b>                                                           |              |                   |
| Current Smoker                                                                  | 6            | 12.0              |
| Former Smoker                                                                   | 7            | 14.0              |
| Alcohol Use Disorder                                                            | 2            | 4.0               |
| Substance Abuse Disorder                                                        | 2            | 4.0               |
| <b>Baseline symptoms<sup>1</sup></b>                                            |              |                   |
| Obesity                                                                         | 4            | 36.0              |
| CAD                                                                             | 5            | 45.0              |
| Hypertension                                                                    | 7            | 64.0              |
| <b>Days of plasma collection between admission and later in hospitalization</b> |              |                   |
| 1-7 days                                                                        | 36           | 72.0              |
| over 8 days                                                                     | 14           | 28.0              |
| <b>White Blood Cell Count</b>                                                   |              |                   |
| upon admission low                                                              | 15           | 26.0              |
| later in hospitalization low                                                    | 5            | 10.0              |
| <b>Lymphocyte Count</b>                                                         |              |                   |
| upon admission Low                                                              | 18           | 36.0              |
| later in hospitalization Low                                                    | 4            | 8.0               |
| <b>C Reactive Protein high<sup>2</sup></b>                                      | 46           | 92.0              |
| <b>Interleukin 6<sup>3</sup></b>                                                |              |                   |
| Abnormal High (pg/ml)                                                           | 8            | 16.0              |

<sup>1</sup>data available for 11 patients, CAD, coronary artery disease; <sup>2</sup>abnormal ( $\geq 5 \mu\text{ml}^{-1}$ ) any day during hospitalization; <sup>3</sup>patient range 8.3-255.1, reference range  $\leq 2.0$ ;

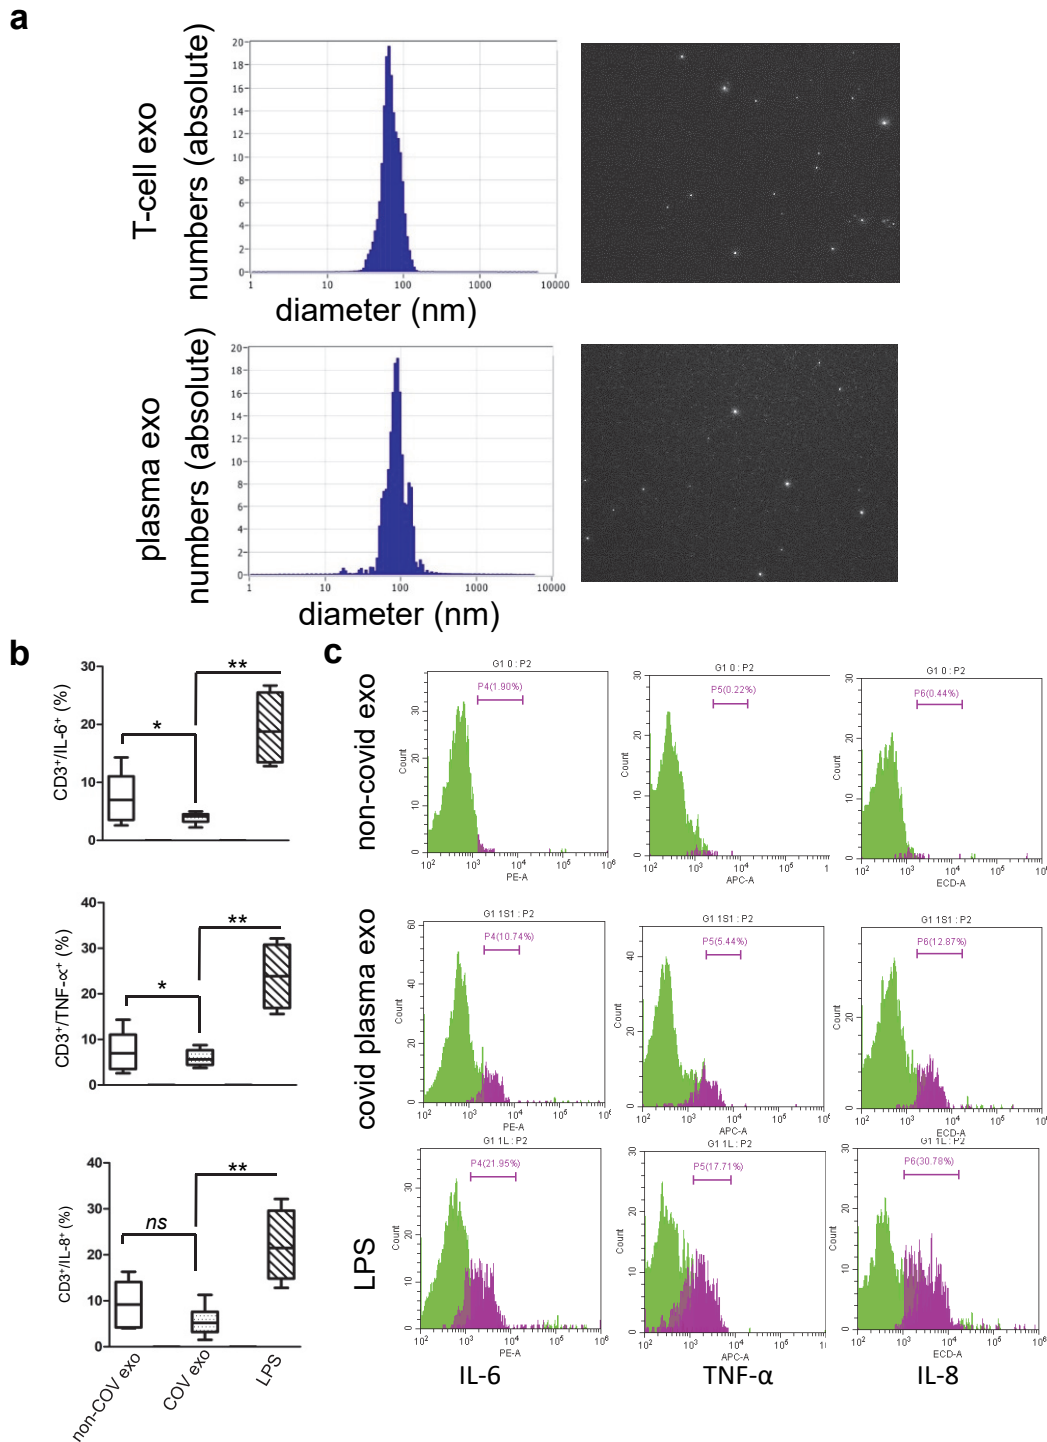

**Figure S1. Nanoparticle tracking analysis of exosomes and immune responses of CD3<sup>+</sup> lymphocytes to COVID-19 plasma exosomes.** (a) Size distribution of exosomes from culture supernatants of T cells (T-cell exo) and plasma of healthy donors (plasma exo) determined by the nanoparticle tracking analyzer ZetaView. Screenshots of particles in right panels. (b) PBMC were treated with plasma exosomes ( $2 \times 10^9 \text{ m}^{-1}$ ) from COVID-19 patients (covid plasma exo) and non-COVID-19 donors (non-covid exo) as well as LPS ( $10 \mu\text{g ml}^{-1}$ ) for 16 h at  $37^\circ\text{C}$ , followed by flow cytometry to quantify IL-6, IL-8, and TNF- $\alpha$  in PBMC gated on CD3<sup>+</sup> lymphocytes as described in Fig. 2b. Percentages of cytokine positive cells were labeled. Isotype antibody control and blank control assays were performed in parallel. Data represent average  $\pm$  SD,  $n=10$ , one-way ANOVA equal variant; \*,  $p < 0.05$ ; \*\*,  $p < 0.01$ . (c) Histograms of b.

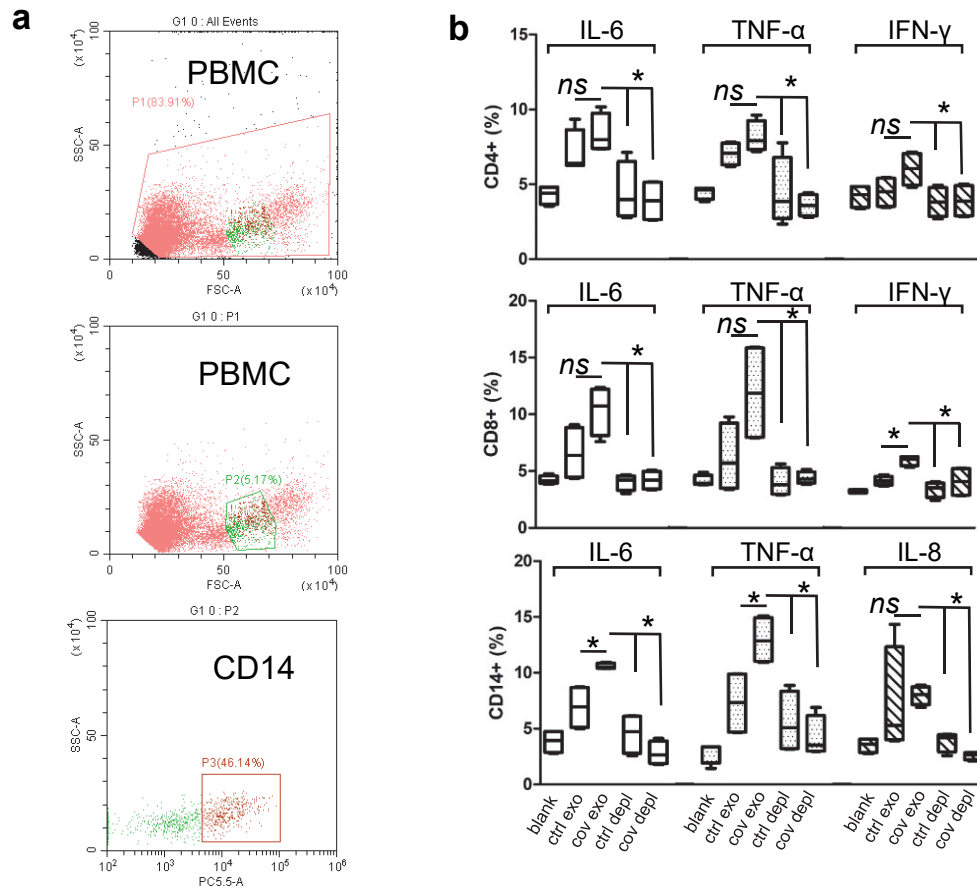

**Figure S2.** (a) Gating strategy for CD14<sup>+</sup> monocytes in PBMC. (b) Expression of IL-6, IL-8, TNF- $\alpha$ , and IFN $\gamma$  in PBMC treated with exosomes ( $4 \times 10^9$  ml<sup>-1</sup>) from culture supernatants of control VERO E6 cells (ctrl exo), SARS-CoV-2- $\Delta$ N/EGFP cells (cov exo), remained untreated (blank), and exosome-depleted culture supernatants from control (ctrl depl) and SARS-CoV-2- $\Delta$ N/EGFP cells (cov depl) for 16 h at 37 °C, followed by flow cytometry as in Figure 2. Data represent average  $\pm$ SD;  $n=5$ ; \*  $p < 0.05$ ; ns,  $p > 0.05$ ; one-way ANOVA. Isotype antibody controls and blank controls were performed in parallel in flow cytometry.

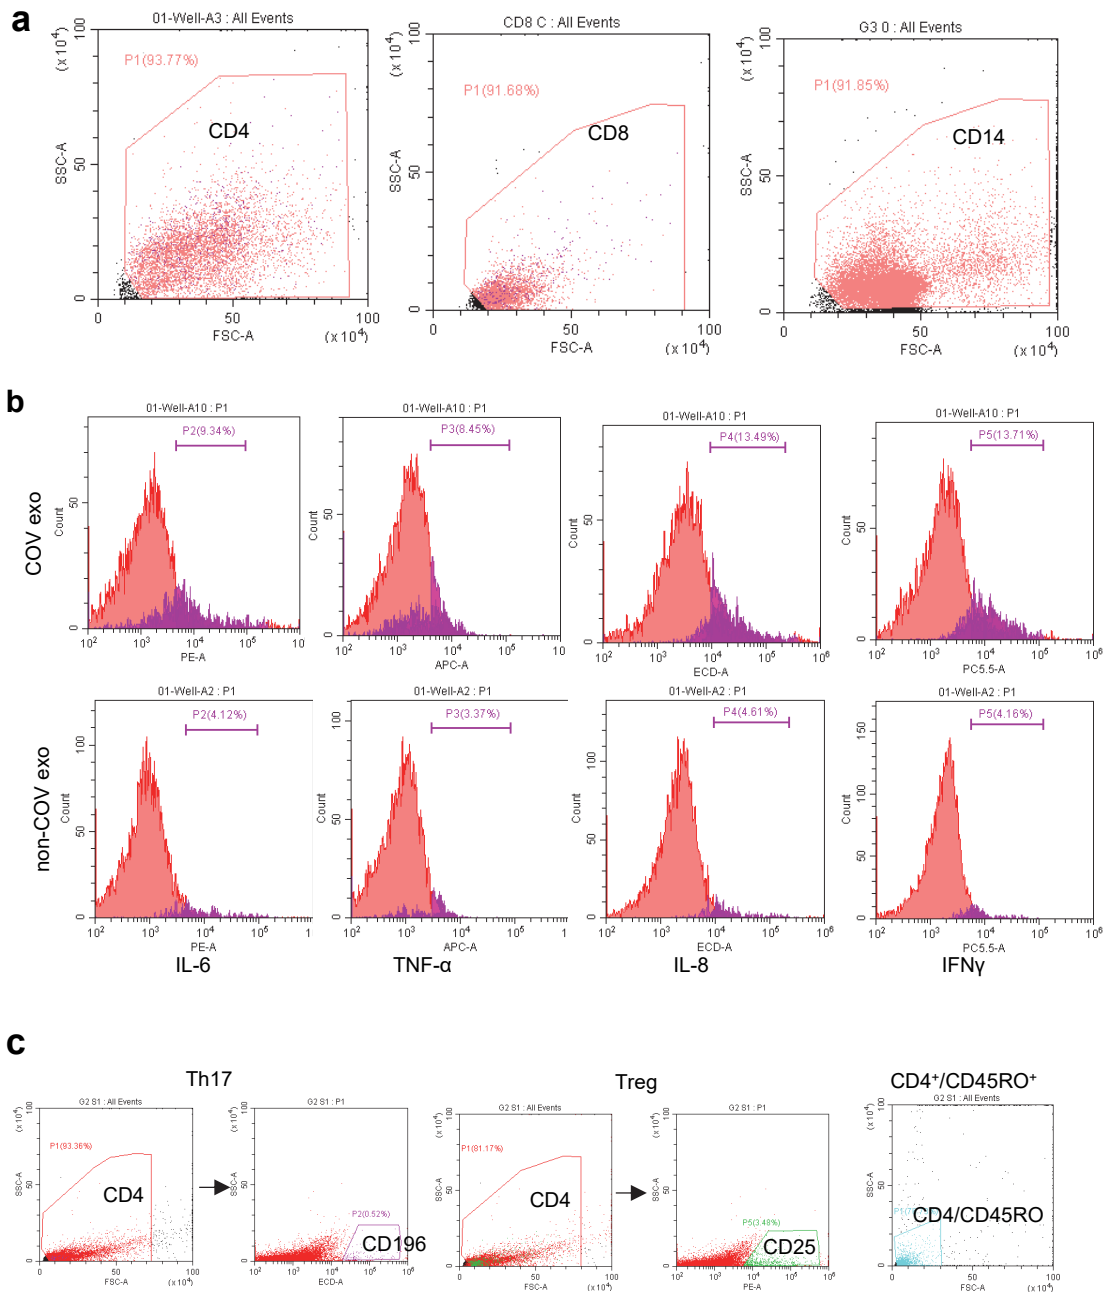

**Figure S3. Response of subsets of immune cells to plasma exosomes.** (a) CD4<sup>+</sup> T cells, CD8<sup>+</sup> T cells, and CD14<sup>+</sup> monocytes were isolated from PBMCs using MicroBeads and gated on live cells. (b) Representative flow cytometry graphs of IL-6, TNF- $\alpha$ , IL-8, and IFN $\gamma$  production in MicroBeads selected CD4<sup>+</sup> T cells in response to COVID-19 plasma exosomes (COV exo) from patients early in admission and non-COVID-19 plasma exosomes (non-COV exo). Percentage of cytokine expressing cells were presented. (c) MicroBeads selected CD4<sup>+</sup> T cells were gated on live cells and CD196<sup>+</sup> (CCR6) for Th17 T cells, CD4<sup>+</sup> and CD25<sup>+</sup> for Tregs. CD4<sup>+</sup> central memory T cells were selected using the Human Central Memory T Cell Isolation kit (Miltenyi Inc.) and gated on live cells. Isotype antibody controls and blank controls were performed in parallel.
